# Supplementary material
Source: publisher figshare collection journal article supplement (https://tandf.figshare.com/ndownloader/files/22364691)
Supplement: Supplementary file 1 [file 22364691]

#Specify the working directory containing the files 
setwd("***INSERT HERE THE FOLDER PATH****")

#Uploading all needed packages (i.e., mlVAR and glmnet) and functions (i.e., read_network and lasso) for running the analyses
#dyadmlvar can currently be obtained from github [REMOVED FOR BLIND REIVEW] and can be installed
#automatically using the devtools package install_github function (devtools::install_github(REMOVED FOR BLIND REVIEW)).
#In the future it will be uploaded to CRAN.
require("dyadmlvar")
require("mlVAR")

########################################Sample 1##############################################
#Uploading diary data
temp1<-read.csv("Sample 1 Diary data.csv")
summary(temp1)
#This file contains the following variables:
#ID- the couples' ids; DIARYDAY- the day in the study; 
#M_anx.- men's anxiety; M_sad.- men's sadness; M_vig.- men's vigor; M_con.- men's contentment
#W_anx.- women's anxiety; W_sad.- women's sadness; W_vig.- women's vigor; W_con.- wommen's contentment
#Note- The file can contain as many variables as needed,
  #but they should be ordered with parnter A's variables coming first 
  #and in the same order across partners (e.g., for both partner A and partnerB anxiety is the first variable). 

#Specify the names of the emotion variables
var.names<-names(temp1)[c(3:10)]

#Running the mlVAR function for constructing the networks
fit1 <- mlVAR(temp1, vars = var.names, idvar = "ID", beepvar="DIARYDAY" ,lags = 1,scale=T,scaleWithin = T)
# Summary of networks' estimates- 
#(in the manuscript these appear in Table 2 [temporal network] 
#and Table 4 [contemporaneous and between-couple networks])
summary(fit1)

#Plotting the temporal network (Figure 1 left panel): 
plot(fit1, "temporal", title = "Sample 1:Temporal Network", layout = "circle",label.cex=1.2,
     legend.cex = 0.5, filename="Temporal", alpha = 0.05, edge.labels = TRUE)
#Plotting the contemporaneous network (Figure 3 left panel):   
plot(fit1, "contemporaneous", title = "Sample 1: Contemporaneous Network", layout = "circle",label.cex=1.2,
     legend.cex = 0.5, filename="Contemporaneous", alpha = 0.05, edge.labels = TRUE)
#Plotting the between-couple network (Figure 4 left panel:
plot(fit1, "between", title = "Sample 1: Between-Couples Network", layout = "circle",label.cex=1.2,
     legend.cex = 0.5, filename="Between", alpha = 0.05, edge.labels = TRUE)


#Running the read_network function which creates a list object containing the following objects:
#1.	contemp- a list of objects related to the contemporaneous network 
  #1.1.	names- a vector containing the names of the network edges (associations) 
  #1.2.	strength_names - a list containing the names of the network centrality estimates. These were calculated per couple using the network random estimates.  
  #1.3.	inter_names - a vector containing the names of all inter-personal edges (associations) 
  #1.4.	intra_names - a vector containing the names of all intra-personal edges (associations) 
  #1.5.	intra_partA_names - a vector containing the names of all partner A's intra-personal edges (associations)
  #1.6.	intra_partB_names -  a vector containing the names of all partner B's intra-personal edges (associations)
  #1.7.	density_names - a vector containing the names of network density indices:
    #  1.7.1.	cont.intra_A.density- the average of the absolute estimates of the intra-personal associations for partner A
    #  1.7.2.	cont.intra_B.density- the average of the absolute estimates of the intra-personal associations for partner B
    #  1.7.3.	intra.density- the average of cont.intra_A.density and cont.intra_B.density
    #  1.7.4.	inter.density - the average of the absolute estimates of the inter-personal associations
    #  1.7.3.	 ratio.density - the ratio of the inter.density and intra.density density estimates
  #1.8.	strength- a vector containing the average associations of a particular variable with all other variables in the network. These were calculated at the sample level using the fixed effects.
  #1.9.	all- a data frame containing all network estimates (including simple edges, strength, and density estimates) for each couple (i.e., using the random+fixed effects)

#2.	temporal - a list of objects related to the temporal network. It contains the same objects listed above for the contemp list.  

#3.	var - a list of the following objects
  #3.1.	names - a vector containing the names of the emotion nodes (variables) used to construct the network
  #3.2.	len - the length of the names vector 
  #3.3.	num - the number of unique associations in the temporal network (i.e., the number of cells in the network associations matrix) 

ntwrk <- dyadmlvar::read_network(fit1)

#Uploading the relationship satisfaction data  
sat<-read.csv("Sample 1 Satisfaction data.csv")
summary(sat)
#This file contains the following variables:
#ID- the couples ids; 
#M_pre_D_csi- men's relationship satisfaction reported before the diary period
#M_post_D_csi- men's relationship satisfaction reported after the diary period
#M_csi_resid- men's relationship satisfaction standardized residual scores obtained from regressing their post-diary reports on their pre-diary reports
#W_pre_D_csi- women's relationship satisfaction reported before the diary period
#W_post_D_csi- women's relationship satisfaction reported after the diary period
#W_csi_resid- women's relationship satisfaction standardized residual scores obtained from regressing their post-diary reports on their pre-diary reports

#merging couples' temporal and contempraneous networks data with their relationship satisfaction data
all<-merge(ntwrk$contemp$all,ntwrk$temporal$all, by=c("ID"),all=T,sort=T)
all<-merge(all,sat, by=c("ID"),all=T,sort=T)

#Running the lasso function for testing the predictive value of the networks 
#Note- this function allows us to partition the dataset into test data and train data 
#(by setting the Train parameter to True), 
#and setting the proportion of train to test data. 

#first setting the names of the predictors to be used in the analyses, 
  #by using the dyadmlvar's get_name function 
pre_inter<- get_names(ntwrk,part=INTER,time=ALL_NETWORK)
pre_intra_men<-get_names(ntwrk,part=INTRA_A,time=ALL_NETWORK)
pre_intra_women<-get_names(ntwrk,part=INTRA_B,time=ALL_NETWORK)
#Predicting women's CSI 
(women.csi_r_inter<-dyadmlvar::lasso(Data=all,Predictors=pre_inter,Outcome="W_csi_resid",Train=F,PropOfTrain = .75))
(women.csi_r_intra<-dyadmlvar::lasso(Data=all,Predictors=pre_intra_women,Outcome="W_csi_resid",Train=F,PropOfTrain = .75))
#Predicting men's time 2 CSI 
(men.csi_r_inter<-dyadmlvar::lasso(Data=all,Predictors=pre_inter,Outcome="M_csi_resid",Train=F,PropOfTrain = .75))
(men.csi_r_intra<-dyadmlvar::lasso(Data=all,Predictors=pre_intra_men,Outcome="M_csi_resid",Train=F,PropOfTrain = .75))

#removing all objects 
rm(list = ls(all = TRUE))

########################################Sample 2##############################################
#Specify the working directory containing the files 
setwd("C:\\Users\\user\\Dropbox\\ARLAB shared folder\\Haran\\Network paper\\OSM files")

#Uploading diary data of sample 2
temp1<-read.csv("Sample 2 Diary data.csv")
summary(temp1)
#This file contains the same variables as in Sample 1 (see code lines 15-18)
#Specify the names of the emotion variables
var.names<-names(temp1)[c(3:10)]

#Running the mlVAR function for constructing the networks
fit1 <- mlVAR(temp1, vars = var.names, idvar = "ID", beepvar="DIARYDAY" ,lags = 1,scale=T,scaleWithin = T)
# Summary of networks' estimates- 
#(in the manuscript these appear in Table 3 [temporal network] 
#and Table 5 [contemporaneous and between-couple networks])
summary(fit1)

#Plotting the temporal network (Figure 3 right panel): 
plot(fit1, "temporal", title = "Sample 2:Temporal Network", layout = "circle",label.cex=1.2,
     legend.cex = 0.5, filename="Temporal", alpha = 0.05, edge.labels = TRUE)
#Plotting the contemporaneous network (Figure 4 right panel):   
plot(fit1, "contemporaneous", title = "Sample 2: Contemporaneous Network", layout = "circle",label.cex=1.2,
     legend.cex = 0.5, filename="Contemporaneous", alpha = 0.05, edge.labels = TRUE)
#Plotting the between-couple network (Figure 5 right panel):
plot(fit1, "between", title = "Sample 2: Between-Couples Network", layout = "circle",label.cex=1.2,
     legend.cex = 0.5, filename="Between", alpha = 0.05, edge.labels = TRUE)

#Running the read_network function 

ntwrk <- dyadmlvar::read_network(fit1)

#Uploading the relationship satisfaction data  
sat<-read.csv("Sample 2 Satisfaction data.csv")
summary(sat)

#This file contains the following variables:
#ID- the couples ids; 
#M_pre_P_csi- men's relationship satisfaction reported pre-partum 
#M_pre_D_csi- men's relationship satisfaction reported before the diary period
#M_post_D_csi- men's relationship satisfaction reported after the diary period
#M_csi_resid_1- men's relationship satisfaction standardized residual scores obtained from regressing their post-diary reports on their pre-partum reports
#M_csi_resid_2- men's relationship satisfaction standardized residual scores obtained from regressing their post-diary reports on their pre-diary reports

#W_pre_P_csi- women's relationship satisfaction reported pre-partum 
#W_pre_D_csi- women's relationship satisfaction reported before the diary period
#W_post_D_csi- women's relationship satisfaction reported after the diary period
#W_csi_resid_1- women's relationship satisfaction standardized residual scores obtained from regressing their post-diary reports on their pre-partum reports
#W_csi_resid_2- women's relationship satisfaction standardized residual scores obtained from regressing their post-diary reports on their pre-diary reports


#merging couples' temporal and contempraneous networks data with their relationship satisfactiton data
all<-merge(ntwrk$contemp$all,ntwrk$temporal$all, by=c("ID"),all=T,sort=T)
all<-merge(all,sat, by=c("ID"),all=T,sort=T)

#Running the lasso function for testing the predictive value of the networks 
names(sat)
#first setting the names of the predictors to be used in the analyses 
pre_inter<- get_names(ntwrk,part=INTER,time=ALL_NETWORK)
pre_intra_men<-get_names(ntwrk,part=INTRA_A,time=ALL_NETWORK)
pre_intra_women<-get_names(ntwrk,part=INTRA_B,time=ALL_NETWORK)
#Predicting women's CSI (controlling for pre-partum satisfactiton)
(women.csi_r_inter<-dyadmlvar::lasso(Data=all,Predictors=pre_inter,Outcome="W_csi_resid_1",Train=F,PropOfTrain = .75))
(women.csi_r_intra<-dyadmlvar::lasso(Data=all,Predictors=pre_intra_women,Outcome="W_csi_resid_1",Train=F,PropOfTrain = .75))
#Predicting men's CSI (controlling for pre-partum satisfactiton)
(men.csi_r_inter<-dyadmlvar::lasso(Data=all,Predictors=pre_inter,Outcome="M_csi_resid_1",Train=F,PropOfTrain = .75))
(men.csi_r_intra<-dyadmlvar::lasso(Data=all,Predictors=pre_intra_men,Outcome="M_csi_resid_1",Train=F,PropOfTrain = .75))
#Predicting women's CSI (controlling for pre-diary satisfactiton)
(women.csi_r_inter<-dyadmlvar::lasso(Data=all,Predictors=pre_inter,Outcome="W_csi_resid_2",Train=F,PropOfTrain = .75))
(women.csi_r_intra<-dyadmlvar::lasso(Data=all,Predictors=pre_intra_women,Outcome="W_csi_resid_2",Train=F,PropOfTrain = .75))
#Predicting men's CSI (controlling for pre-diary satisfactiton)
(men.csi_r_inter<-dyadmlvar::lasso(Data=all,Predictors=pre_inter,Outcome="M_csi_resid_2",Train=F,PropOfTrain = .75))
(men.csi_r_intra<-dyadmlvar::lasso(Data=all,Predictors=pre_intra_men,Outcome="M_csi_resid_2",Train=F,PropOfTrain = .75))

#removing all objects 
rm(list = ls(all = TRUE))


#############################################
#Network Comparison Test (NCT) for comparing the InterIntra ratio density indices 
#of the two samples (see Figure 2 in the manuscript)
sample1<-read.csv("Sample 1 Diary data.csv")
sample2<-read.csv("Sample 2 Diary data.csv")
var.names<-names(sample1)[c(3:10)]
fit1.1 <- mlVAR::mlVAR(sample1, vars = var.names, idvar = "ID", beepvar="DIARYDAY" ,lags = 1,scale=T,scaleWithin = T)
fit2.1 <- mlVAR::mlVAR(sample2, vars = var.names, idvar = "ID", beepvar="DIARYDAY" ,lags = 1,scale=T,scaleWithin = T)
ntwrk1.1 <- dyadmlvar::read_network(fit1.1)
ntwrk2.1 <- dyadmlvar::read_network(fit2.1)

#####Permutation
var.names<-names(temp1)[c(3:10)]
simulated<-data.frame(matrix(ncol = 4,nrow = 0))
for (i in 1:1000){
  cat(paste("Starting iteration #",i,";time:",Sys.time(),"\n"))
  rand.datai<-rbind(sample1,sample2)
  IDs<-unique(rand.datai$ID)
  IDs.1<-sample(IDs,length(unique(sample1$ID)))
  IDs.2<-setdiff(IDs,IDs.1)
  sample1<-subset(rand.datai,ID%in%IDs.1)
  sample2<-subset(rand.datai,ID%in%IDs.2)
  fit1 <- mlVAR::mlVAR(sample1, vars = var.names, idvar = "ID", beepvar="DIARYDAY" ,lags = 1,scale=T,scaleWithin = T,nCores = 4)
  fit2 <- mlVAR::mlVAR(sample2, vars = var.names, idvar = "ID", beepvar="DIARYDAY" ,lags = 1,scale=T,scaleWithin = T,nCores = 4)
  ntwrk1 <- dyadmlvar::read_network(fit1)
  ntwrk2 <- dyadmlvar::read_network(fit2)
  
  temporal.ratio.diff<-mean(ntwrk1$all$temporal.ratio.density)-mean(ntwrk2$all$temporal.ratio.density)
  contemp.ratio.diff<-mean(ntwrk1$all$cont.ratio.density)-mean(ntwrk2$all$cont.ratio.density)
  between.ratio.diff<-as.numeric(dyadmlvar::between_network(fit1)[5])-as.numeric(dyadmlvar::between_network(fit2)[5])
  
  a<-data.frame(temporal.ratio.diff=temporal.ratio.diff,
                contemp.ratio.diff=contemp.ratio.diff,
                between.ratio.diff=between.ratio.diff)
  a$simulationNo<-i
  simulated<-rbind(a,simulated)
}

null.distribution<-simulated
head(null.distribution)
#temporal ratio diff. 
(qts<-quantile(null.distribution[,1],probs = c(.05,.95)))
hist(null.distribution[,1],breaks = 50,col="grey",xlab="Temporal Ratio Difference", main = "H0:Distribution")
abline(v=qts[1],col="red")
abline(v=qts[2],col="red")
real.diff<-mean(ntwrk1.1$all$temporal.ratio.density)-mean(ntwrk2.1$all$temporal.ratio.density)
abline(v=real.diff,col="blue")
f<-ecdf(null.distribution[,1])
paste0("CI 5%:",round(qts[1],4),"  95%:",round(qts[2],4)," OBS Diff=" ,round(real.diff,4),"; p=",round(1-f(real.diff),4))
#cont ratio diff
(qts<-quantile(null.distribution[,2],probs = c(.05,.95)))
hist(null.distribution[,2],breaks = 50,col="grey",xlab="Contemporaneous Ratio Difference", main = "H0:Distribution")
abline(v=qts[1],col="red")
abline(v=qts[2],col="red")
real.diff<-mean(ntwrk1.1$all$cont.ratio.density)-mean(ntwrk2.1$all$cont.ratio.density)
abline(v=real.diff,col="blue")
f<-ecdf(null.distribution[,2])
paste0("CI 5%:",round(qts[1],4),"  95%:",round(qts[2],4)," OBS Diff=" ,round(real.diff,4),"; p=",round(f(real.diff),4))
#Between ratio diff
(qts<-quantile(null.distribution[,3],probs = c(.05,.95)))
hist(null.distribution[,3],breaks = 50,col="grey",xlab="Between Ratio Difference", main = "H0:Distribution")
abline(v=qts[1],col="red")
abline(v=qts[2],col="red")
real.diff<-as.numeric(dyadmlvar::between_network(fit1.1)[5])-as.numeric(dyadmlvar::between_network(fit2.1)[5])
abline(v=real.diff,col="blue")
f<-ecdf(null.distribution[,3])
paste0("CI 5%:",round(qts[1],4),"  95%:",round(qts[2],4)," OBS Diff=" ,round(real.diff,4),"; p=",round(1-f(real.diff),4))

######################################
#assessing edges' replicability across samples (see Figure 2 in the manuscript)
library(psych)
summary.1<-(summary(fit1.1))
summary.2<-(summary(fit2.1))
corr.test(summary.1$temporal$fixed,summary.2$temporal$fixed)
corr.test(summary.1$contemporaneous$pcor,summary.2$contemporaneous$pcor)
corr.test(summary.1$between$pcor,summary.2$between$pcor)
